# Supplementary material for: Strategies for Efficient Targeting of Tumor Collagen for Cancer Therapy
Source: MDPI journal article supplement (doi:10.3390/cancers14194706), 2022-09-27
Supplement: s1 [file s1]

# Supplementary Materials: Strategies for Efficient Targeting of Tumor Collagen for Cancer Therapy

Silvia Baldari, Francesca Di Modugno, Paola Nisticò and Gabriele Toietta

**Table S1.** Collagen types, sub-groups and their main tissue distribution.

| Collagen Type | Collagen Sub-Group | Tissue Distribution in Healthy Tissue                                                                                    | Tissue Distribution in Associated Cancers                       |
|---------------|--------------------|--------------------------------------------------------------------------------------------------------------------------|-----------------------------------------------------------------|
| I             | Fibrillar          | Connective tissues, skin, dermis, cornea, tendon, bone                                                                   | Bone, breast, colon, ovary, lung, pancreas                      |
| II            | Fibrillar          | Cartilage                                                                                                                | Bone (chondrosarcoma)                                           |
| III           | Fibrillar          | Dermis, aorta and blood vessels, uterus, intestine and reticular connective tissue of visceral organs and adipose tissue | Breast, colon, head and neck, pancreas                          |
| IV            | Network-forming    | Basal laminae                                                                                                            |                                                                 |
| V             | Fibrillar          | Cornea, placental/embryonic tissue                                                                                       | Breast                                                          |
| VI            | Beaded filaments   | Ubiquitous, but particularly in skeletal muscle                                                                          | Breast, colon, ovary, brain (glioma), skin (melanoma), pancreas |
| VII           | Anchoring fibrils  | Skin, amniotic membrane, cornea, mucosal epithelium                                                                      |                                                                 |
| VIII          | Network-forming    | Descemet's membrane of the eye, endothelial cells                                                                        |                                                                 |
| IX            | FACIT              | Cartilage                                                                                                                |                                                                 |
| X             | Network-forming    | Hypertrophic cartilage                                                                                                   |                                                                 |
| XI            | Fibrillar          | Cartilage, intervertebral disc, skeletal muscle, lung                                                                    | Head and neck, breast, stomach, lung, ovary, pancreas           |
| XII           | FACIT              | Cartilage, bone, dense connective tissue                                                                                 | Breast                                                          |
| XIII          | Transmembrane      | Cutaneous tissue; neuromuscular junctions                                                                                |                                                                 |
| XIV           | FACIT              | Dermis, tendon, cartilage                                                                                                | Head and neck                                                   |
| XV            | Multiplexin        | Placenta, kidney, heart, ovary, testis                                                                                   |                                                                 |
| XVI           | FACIT              | Cartilage, heart, kidney, muscle                                                                                         |                                                                 |
| XVII          | Transmembrane      | Skin hemidesmosomes                                                                                                      |                                                                 |
| XVIII         | Multiplexin        | Kidney, placenta, lung, liver, skin                                                                                      |                                                                 |
| XIX           | FACIT              | Interneurons                                                                                                             |                                                                 |
| XX            | FACIT              | Corneal epithelium, skin, cartilage, and tendon                                                                          |                                                                 |
| XXI           | FACIT              | Blood vessel walls                                                                                                       |                                                                 |
| XXII          | FACIT              | Tissue junctions                                                                                                         |                                                                 |
| XXIII         | Transmembrane      | Cutaneous tissue                                                                                                         | Prostate                                                        |
| XXIV          | Fibrillar          | Differentiating osteoblasts, developing cornea                                                                           |                                                                 |
| XXV           | Transmembrane      | Neurons, hippocampus                                                                                                     |                                                                 |
| XXVI          | FACIT              | Testis and ovary                                                                                                         |                                                                 |
| XXVII         | Fibrillar collagen | Cartilage, embryonic eye, coronary arteries, dermis                                                                      |                                                                 |
| XXVIII        | Network-forming    | Non-myelinated regions of the peripheral nervous system                                                                  |                                                                 |

FACIT: fibrillar-associated collagens with interrupted triple-helices. Adapted with modifications from [1–3].

## References

1. Nissen, N.I.; Karsdal, M.; Willumsen, N. Collagens and cancer associated fibroblasts in the reactive stroma and its relation to Cancer biology. *J. Exp. Clin. Cancer Res.* **2019**, *38*, 115. <https://doi.org/10.1186/s13046-019-1110-6>.
2. Fuller, A.M.; Eisinger-Mathason, T.S.K. Context matters: Response heterogeneity to collagen-targeting approaches in desmoplastic cancers. *Cancers* **2022**, *14*, 3132. <https://doi.org/10.3390/cancers14133132>.
3. Sorushanova, A.; Delgado, L.M.; Wu, Z.; Shologu, N.; Kshirsagar, A.; Raghunath, R.; Mullen, A.M.; Bayon, Y.; Pandit, A.; Raghunath, M.; et al. The collagen suprafamily: From biosynthesis to advanced biomaterial development. *Adv. Mater.* **2019**, *31*, e1801651. <https://doi.org/10.1002/adma.201801651>.
